# Supplementary material for: Molecular Phenotyping of Immune Cells from Young NOD Mice Reveals Abnormal Metabolic Pathways in the Early Induction Phase of Autoimmune Diabetes
Source: PLoS One. 2012 Oct 11;7(10):e46941. doi: 10.1371/journal.pone.0046941 (PMC3469658; doi:10.1371/journal.pone.0046941)
Supplement: Table S4 — Transcripts significantly differentially expressed in spleen leukocytes of 2 week old NOD mice with their ANOVA p-values (Benjamini-Hochberg, p<0.05) and fold-changes relative to two control strains, NON and C57BL/6. A. 162 probesets of significantly lower expression in NOD mice; and B. 25 probesets of significantly higher expression in NOD mice. (XLS) [file pone.0046941.s010.xls]

## Sheet: Cover sheet
Manuscript Title: “Molecular Phenotyping of Immune Cells from Young NOD Mice Reveals Abnormal Metabolic Pathways in the Early Induction Phase of Autoimmune Diabetes”
This file consists of 5 worksheets:
1. Cover sheet - this worksheet
2. Table S1A - showing 162 probesets of significantly (1w-Anova, Benjamini-Hochberg, p<0.05) lower expression in spleen leukocytes from 2 week old NOD mice compared to two control strains (NON and C57BL/6)
3. Table S1B - showing 25 probesets of significantly (1w-Anova, Benjamini-Hochberg, p<0.05) higher expression in spleen leukocytes from 2 week old NOD mice compared to two control strains (NON and C57BL/6)
4. Table S2A - showing 298 probesets of significantly (1w-Anova, Benjamini-Hochberg, p<0.05) lower expression in spleen leukocytes from 4 week old NOD mice compared to two control strains (NON and C57BL/6)
5. Table S2B - showing 29 probesets of significantly (1w-Anova, Benjamini-Hochberg, p<0.05) lower expression in spleen leukocytes from 4 week old NOD mice compared to two control strains (NON and C57BL/6)

## Sheet: Table S4A_162loNOD2wk
Table S4A. 162 probesets of significantly lower expression in spleen leukocytes from 2 week old NOD mice compared to two control strains.
ID_REF	FoldChange_NODvCtrls	adjustedp-value,benj (1w-Anova)	Gene Description
1417822_at	7.75777	6.43e-07	DNA segment, Chr 17, human D6S56E 5
1417821_at	10.2162	7.48e-06	DNA segment, Chr 17, human D6S56E 5
1416479_a_at	9.30254	2.41e-05	transmembrane protein 14C
1456635_at	9.89449	3.07e-05	Sp110 nuclear body protein; antisense in 5' UTR and promoter of Sp110 and A530040E14Rik
1454714_x_at	10.2809	3.11e-05	3-phosphoglycerate dehydrogenase; last exon and proximal 3' UTR
1437432_a_at	26.0645	3.39e-05	tripartite motif protein 12
1450355_a_at	5.90051	3.87e-05	capping protein (actin filament), gelsolin-like
1456471_x_at	11.0051	4.59e-05	3-phosphoglycerate dehydrogenase; mid and distal 3' UTR
1437007_x_at	7.79731	6.47e-05	ubiquitin specific protease 39
1423747_a_at	5.13845	6.47e-05	pyruvate dehydrogenase kinase, isoenzyme 1
1436836_x_at	2.00181	7.15e-05	calponin 3, acidic; mid 3' UTR
1434441_at	3.22982	7.15e-05	human chromosome 9 open reading frame 21 (peroxiredoxin (PRX)-like 2 family); distal 3' UTR
1416494_at	6.88885	0.000102	NADH dehydrogenase (ubiquinone) Fe-S protein 5
1421571_a_at	5.15384	0.00029	lymphocyte antigen 6 complex, locus C
1427441_a_at	2.63635	0.000354	succinate-Coenzyme A ligase, GDP-forming, beta subunit
1416770_at	2.98293	0.000365	serine/threonine kinase 25 (yeast)
1448472_at	4.13552	0.000382	valyl-tRNA synthetase 2
1428592_s_at	2.38177	0.000396	ubiquitin specific protease 38
1455887_at	1.7126	0.000555	sparagine-linked glycosylation 8 (alpha-1,3-glucosyltransferase); last exon and proximal 3' UTR
1424170_at	2.15781	0.000608	PHD finger protein 5A; last exon including all 3' UTR
1443858_at	20.1442	0.000656	Trim5
1440214_at	4.04181	0.00083	RIKEN cDNA A630001G21 gene
1459827_x_at	2.40376	0.00083	Hermansky-Pudlak syndrome 1 homolog (human)
1451602_at	17.3136	0.000834	sorting nexin 6
1426936_at	15.2786	0.000834	UL16 binding protein 1
1439780_at	6.11514	0.000895	ribosomal protein L7-like 1
1435553_at	9.2495	0.000938	PDZ domain containing 3; mid-proximal 3' UTR
1438454_at	4.22026	0.000953	phosphatase and tensin homolog
1418072_at	2.77032	0.000993	histone 1, H2bc
1449648_s_at	3.86229	0.00109	exportin 5
1421802_at	103.149	0.00138	eosinophil-associated, ribonuclease A family, member 1
1423748_at	3.51254	0.00138	pyruvate dehydrogenase kinase isoenzyme 1; distal 3' UTR
1436061_at	3.03074	0.00139	chromatin assembly factor 1, subunit A (p150)
1435745_at	2.93786	0.00164	RIKEN cDNA 5031439G07 gene
1417600_at	6.88428	0.00179	solute carrier family 15 (H+/peptide transporter), member 2
1448450_at	1.59663	0.00206	adenylate kinase 2
1416503_at	3.31892	0.00231	latexin
1451277_at	1.50329	0.00236	zinc binding alcohol dehydrogenase, domain containing 2; distal 3' UTR
1417762_a_at	2.1344	0.00348	ribosomal protein L8
1442338_at	8.67664	0.00367	tumor necrosis factor receptor superfamily, member 14 (herpesvirus entry mediator); far 3' UTR
1418473_at	1.78685	0.00391	cutC copper transporter homolog (E.coli)
1435841_s_at	2.86411	0.00414	succinate-Coenzyme A ligase, GDP-forming, beta subunit
1416629_at	4.52781	0.00428	solute carrier family 1 (neutral amino acid transporter), member 5
1446130_at	7.97735	0.00453	PCTAIRE-motif protein kinase 2 (high T cell expression and strong cisQTL); highly expressed EST in intron 1 of C57BL/6J
1446608_at	5.97917	0.00487	Casitas B-lineage lymphoma
1426614_at	1.76309	0.00509	protein kinase C binding protein 1
1426289_at	1.23638	0.00572	inosine 5'-phosphate dehydrogenase 2
1452841_at	1.96457	0.00625	phosphoglucomutase 2-like 1
1443870_at	1.92338	0.00665	ATP-binding cassette, sub-family C (CFTR/MRP), member 4; distal 3' UTR
1433497_at	1.48614	0.00682	aquarius
1417316_at	1.90931	0.00697	thioesterase superfamily member 2
1438334_at	2.46443	0.00766	dedicator of cyto-kinesis 2
1448810_at	1.58141	0.00787	glucosamine
1423648_at	1.5151	0.00802	thioredoxin domain containing 5 (protein disulfide isomerase associated 6); exons 12, 13 and proximal 3'UTR of long form
1428105_at	2.01873	0.0081	TPX2, microtubule-associated protein homolog (Xenopus laevis)
1452151_at	1.64308	0.00864	cDNA sequence BC021523
1418462_at	2.55435	0.00916	polymyositis/scleroderma autoantigen 1
1423925_at	1.42794	0.00961	DEAH (Asp-Glu-Ala-His) box polypeptide 16
1429234_s_at	1.57219	0.0101	DNA segment, Chr 5, ERATO Doi 606, expressed
1454785_at	1.47765	0.0103	dual specificity phosphatase 11 (RNA/RNP complex 1-interacting)
1418337_at	1.73561	0.0107	ribose 5-phosphate isomerase A
1455070_at	1.92362	0.0112	Transcribed sequence with weak similarity to protein ref:NP_081764.1 (M.musculus) RIKEN cDNA 5730493B19 [Mus musculus]
1449465_at	3.57047	0.0113	reelin
1437088_at	1.38419	0.0116	expressed sequence AA591032
1452086_at	1.49245	0.0117	RIKEN cDNA 2610027O18 gene
1423760_at	1.33304	0.0119	CD44 antigen
1447803_x_at	2.18902	0.0121	capping protein (actin filament), gelsolin-like
1449052_a_at	4.1314	0.0128	DNA methyltransferase 3B
1452192_at	1.90038	0.013	cDNA sequence BC053440
1429193_at	1.59818	0.013	RIKEN cDNA 4631416I11 gene
1419087_s_at	1.48693	0.013	splicing factor 3a, subunit 1
1416559_at	2.82426	0.013	RIKEN cDNA 1500003O22 gene
1428153_at	2.20168	0.0135	mitochondrial ribosomal protein S10
1431708_a_at	6.13141	0.0136	expressed sequence C87436; intronic or distal 3' UTR of the short form of Tia1 (AK009502)
1418778_at	1.99157	0.0137	RIKEN cDNA 9030408N13 gene
1423664_at	1.37193	0.0147	quininoid dihydropteridine reductase
1444236_at	1.24609	0.0155	Transcribed sequences
1460556_at	1.26601	0.0162	DNA Segment, Chr 15 Massachusetts Institute of Technology 260
1455441_at	1.74158	0.0167	mitogen activated protein kinase kinase kinase 7
1428320_at	1.27699	0.0174	RIKEN cDNA 5830462I21 gene
1455398_at	1.33671	0.0179	16 days embryo head cDNA, RIKEN full-length enriched library, clone:C130039P17 product:unknown EST, full insert sequence
1435140_at	1.56173	0.0182	insulin degrading enzyme
1449935_a_at	1.56381	0.0182	DnaJ (Hsp40) homolog, subfamily A, member 3
1451965_at	2.61392	0.0186	Ig rearranged kappa-chain gene V19-J1 region.
1437151_at	1.34711	0.0186	ubiquitin specific protease 22
1433698_a_at	1.17737	0.0195	DNA segment, Chr 18, Wayne State University 98, expressed
1455075_at	2.9883	0.0201	phosphatidylinositol glycan, class V
1416530_a_at	1.6068	0.0201	purine-nucleoside phosphorylase
1416570_s_at	1.52693	0.0201	G elongation factor
1450662_at	1.64932	0.0201	testis specific protein kinase 1
1417592_at	1.3583	0.0204	FK506 binding protein 12-rapamycin associated protein 1
1425262_at	1.27184	0.0212	CCAAT/enhancer binding protein (C/EBP), gamma
1456018_at	1.64364	0.0212	expressed sequence AL022779
1455600_at	1.69978	0.0214	H3079H07-3 NIA Mouse 15K cDNA Clone Set Mus musculus cDNA clone H3079H07 3', mRNA sequence.
1428662_a_at	1.67268	0.0221	homeobox only domain
1456308_x_at	1.59481	0.0226	tripartite motif protein 28
1416118_at	1.61433	0.0237	RIKEN cDNA 2310035M22 gene
1453746_at	1.22048	0.0242	formin binding protein 1
1436585_at	1.6421	0.0243	Transcribed sequences
1448223_at	2.12977	0.0261	fatso
1418536_at	2.27777	0.0262	histocompatibility 2, Q region locus 7
1455524_at	1.35193	0.0264	RIKEN cDNA 2810046L04 gene
1453109_at	3.78612	0.0264	RIKEN cDNA 2810429K17 gene
1451380_at	1.45061	0.0265	zinc finger, FYVE domain containing 19
1423154_at	2.0254	0.0269	cDNA sequence BC005537
1419703_at	2.14507	0.0271	procollagen, type V, alpha 3
1437456_x_at	1.38665	0.0284	RIKEN cDNA 2210410K23 gene
1434312_at	2.21352	0.0284	ADP-ribosylation factor 6
1447458_at	3.41553	0.0284	ST3 beta-galactoside alpha-2,3-sialyltransferase 4
1449849_a_at	1.7427	0.0292	F-box and leucine-rich repeat protein 6
1455771_at	2.05374	0.0293	benzodiazapine receptor associated protein 1
1445271_at	2.88061	0.0293	RIKEN cDNA 9230105E10 gene
1460436_at	2.85885	0.0295	N-deacetylase/N-sulfotransferase (heparan glucosaminyl) 1
1415691_at	1.2529	0.0296	discs, large homolog 1 (Drosophila)
1434316_at	1.50068	0.0296	carbohydrate (chondroitin) synthase 1
1425346_at	1.6561	0.0312	zinc finger protein 318
1455935_at	1.88644	0.0313	RIKEN cDNA 2410131K14 gene
1425340_a_at	1.29344	0.0314	protein tyrosine phosphatase, receptor type, A
1451833_a_at	1.55482	0.0317	SET domain, bifurcated 1
1433898_at	1.94307	0.0317	RIKEN cDNA 4933433D23 gene
1429532_at	1.4862	0.0319	zinc finger, CW-type with coiled-coil domain 1
1451351_at	1.34604	0.0335	tetratricopeptide repeat domain 13
1452702_at	1.62189	0.0335	chloride channel 7
1418642_at	1.69036	0.0335	lymphocyte cytosolic protein 2
1423587_a_at	1.52223	0.034	polymyositis/scleroderma autoantigen 2
1437584_at	4.62376	0.0344	WD repeat domain 5B
1415764_at	1.5791	0.0356	RIKEN cDNA 5730454B08 gene
1425336_x_at	1.48671	0.0363	histocompatibility 2, K region
1421817_at	2.08816	0.0363	glutathione reductase 1
1417961_a_at	1.79189	0.0373	tripartite motif protein 30
1454973_at	1.71886	0.038	RIKEN cDNA 2610204M12 gene
1446484_at	2.40376	0.0384	2 days pregnant adult female ovary cDNA, RIKEN full-length enriched library, clone:E330033N02 product:unclassifiable, full insert sequence
1434376_at	1.52906	0.0393	CD44 antigen
1455564_at	1.64774	0.04	breakpoint cluster region homolog
1429614_at	1.1147	0.0409	RIKEN cDNA 2810441A10 gene
1433599_at	1.60849	0.0417	hypothetical protein B930060C03
1453091_s_at	1.43813	0.0418	BB241583 RIKEN full-length enriched, 3 days neonate thymus Mus musculus cDNA clone A630087L22 3', mRNA sequence.
1426815_s_at	1.25762	0.0419	hypothetical protein MGC38812
1435072_at	1.2612	0.0419	zinc finger, FYVE domain containing 1
1430047_at	3.27895	0.0419	RIKEN cDNA 2700017A04 gene
1433927_at	1.28198	0.0429	RIKEN cDNA E430026A01 gene
1436037_at	1.55473	0.043	ceramide kinase-like
1448146_at	1.38044	0.043	RIKEN cDNA 1300010O06 gene
1417101_at	1.23778	0.0432	heat shock protein 2
1452897_at	1.42741	0.0433	cell division cycle 2-like 5 (cholinesterase-related cell division controller)
1453257_at	1.48981	0.0447	DNA segment, Chr 8, ERATO Doi 319, expressed
1421052_a_at	1.31191	0.0448	spermine synthase
1438008_at	1.36543	0.0457	golgi associated, gamma adaptin ear containing, ARF binding protein 3
1439154_at	1.63535	0.0457	expressed sequence AI849286
1454961_at	1.68264	0.0463	RIKEN cDNA A930006D20 gene
1435032_at	1.40317	0.0463	golgi autoantigen, golgin subfamily b, macrogolgin 1
1438561_x_at	2.28967	0.0463	BB400326 RIKEN full-length enriched, ES cells Mus musculus cDNA clone C330018B13 3', mRNA sequence.
1417655_a_at	1.30611	0.0471	arsenate resistance protein 2
1459861_s_at	1.37319	0.0471	AV221085 RIKEN full-length enriched, 14, 17 days embryo head Mus musculus cDNA clone 3230402N12 3', mRNA sequence.
1415702_a_at	1.20039	0.0477	C-terminal binding protein 1
1435836_at	1.55689	0.0479	RIKEN cDNA D530020C15 gene
1423820_at	1.5477	0.0479	RIKEN cDNA 1110011K10 gene
1454792_s_at	1.25458	0.048	selenophosphate synthetase 1
1452760_at	1.26408	0.0483	RIKEN cDNA 2510012J08 gene
1454112_a_at	2.96938	0.0483	HAUS augmin-like complex, subunit 2; proximal 3' UTR
1451354_at	1.41172	0.0488	cDNA sequence BC024806
1455331_at	1.24366	0.0499	Adult male hypothalamus cDNA, RIKEN full-length enriched library, clone:A230102O09 product:unclassifiable, full insert sequence
Statistical analysis of mRNA expression data by 1-way-ANOVA (Benjamini-Hochberg, p<0.05) followed by hierarchical clustering identified 162 probe sets of lower expression in spleen leukocytes of 2 week old NOD mice compared to 2 control strains (NON and C57BL/6). Fold change was calculated based on mean expression values for NOD mice versus mean expression values for control mice combined. The pr…

## Sheet: Table S4B_25hiNOD2wk
Table S4B. 25 probesets of significantly higher expression in spleen leukocytes from 2 week old NOD mice compared to two control strains.
ID_REF	FoldChange_NODvCtrls	adjustedpvalue,benj (1w-Anova)	Gene Description
1457769_at	29.748	2.41e-05	Histocompatibility 60aTRANSCRIPTASE HOMOLOG
1417461_at	25.1686	3.96e-05	CAP, adenylate cyclase-associated protein 1 (yeast) - distal 3' UTR
1435660_at	2.79327	0.000271	similar to SP140 nuclear body protein; nuclear body protein Sp140
1437937_at	2.76919	0.000834	chemokine binding protein 2
1449991_at	2.73637	0.00099	CD244 natural killer cell receptor 2B4
1417462_at	46.6631	0.00204	CAP, adenylate cyclase-associated protein 1 (yeast)-exons 9,11,13 and proximal 3' UTR
1424265_at	2.15436	0.0069	N-acetylneuraminate pyruvate lyase
1421907_at	3.01897	0.0107	peroxisome proliferator activated receptor binding protein
1446342_at	5.26291	0.0116	Adult male bone cDNA, RIKEN full-length enriched library, clone:9830143P17 product:unknown EST, full insert sequence
1452521_a_at	1.81929	0.0144	urokinase plasminogen activator receptor
1418148_at	1.81492	0.0147	abhydrolase domain containing 1
1421622_a_at	1.86843	0.0149	Rap guanine nucleotide exchange factor (GEF) 4
1425908_at	2.38158	0.0196	guanine nucleotide binding protein, beta 1; intron (from EST BC003294)
1421214_at	2.54776	0.0211	cytidine monophospho-N-acetylneuraminic acid hydroxylase
1421056_at	7.16684	0.0243	deoxyribonuclease 1-like 3
1452677_at	4.51076	0.0296	polyribonucleotide nucleotidyltransferase 1; distal 3' UTR of the long variant
1423569_at	1.65245	0.0301	glycine amidinotransferase (L-arginine:glycine amidinotransferase)
1447166_at	7.165	0.0356	Transcribed sequences
1434375_at	1.71846	0.0371	RIKEN cDNA B930006L02 gene
1418638_at	2.31098	0.0371	histocompatibility 2, class II, locus Mb1
1450933_at	1.78025	0.0379	phosphodiesterase 7A
1423198_a_at	1.84538	0.0384	SMEK homolog 2 suppressor of mek1; four exons
1455735_at	2.79123	0.0394	adaptor-related protein complex AP-1, sigma 3; distal 3' UTR
1438491_x_at	1.80778	0.0431	regulator of sex-limitation candidate 3
1427799_x_at	6.33005	0.0457	immunoglobulin kappa chain variable 8 (V8)
Statistical analysis of mRNA expression data by 1-way-ANOVA (Benjamini-Hochberg, p<0.05) followed by hierarchical clustering identified 25 probe sets of higher expression in spleen leukocytes of 2 week old NOD mice compared to 2 control strains (NON and C57BL/6). Fold change was calculated based on mean expression values for NOD mice versus mean expression values for control mice combined. The pr…
