# Supplementary material for: Molecular Phenotyping of Immune Cells from Young NOD Mice Reveals Abnormal Metabolic Pathways in the Early Induction Phase of Autoimmune Diabetes
Source: PLoS One. 2012 Oct 11;7(10):e46941. doi: 10.1371/journal.pone.0046941 (PMC3469658; doi:10.1371/journal.pone.0046941)
Supplement: Table S5 — Transcripts significantly differentially expressed in spleen leukocytes of 4 week old NOD mice with their ANOVA p-values (Benjamini-Hochberg, p<0.05) and fold-changes relative to two control strains, NON and C57BL/6. A. 298 probesets of significantly lower expression in NOD mice; and B. 29 probesets of significantly higher expression in NOD mice. (XLS) [file pone.0046941.s011.xls]

## Sheet: Table S5A_298loNODwk
Table S5A. 298 probesets of significantly lower expression in spleen leukocytes from 4 week old NOD mice compared to two control strains.
ID_REF	FoldChange_NODvCtrls	adjustedp-value,benj (1w-Anova)	Gene Description
1417822_at	6.35183	7.6e-09	DNA segment, Chr 17, human D6S56E 5
1440845_at	12.1298	3.64e-06	cyclin D binding myb-like transcription factor 1; antisense of first intron
1450355_a_at	3.94868	3.64e-06	capping protein (actin filament), gelsolin-like
1456471_x_at	5.82343	5.45e-06	3-phosphoglycerate dehydrogenase; mid and distal 3' UTR
1437432_a_at	51.4502	6.17e-06	tripartite motif protein 12
1416494_at	7.23636	1.33e-05	NADH dehydrogenase (ubiquinone) Fe-S protein 5
1417600_at	5.34471	1.76e-05	solute carrier family 15 (H+/peptide transporter), member 2
1421571_a_at	4.61404	1.76e-05	lymphocyte antigen 6 complex, locus C
1423747_a_at	6.64595	1.99e-05	pyruvate dehydrogenase kinase, isoenzyme 1
1456635_at	13.8232	2.1e-05	Sp110 nuclear body protein; antisense in 5' UTR and promoter of Sp110 and A530040E14Rik
1431708_a_at	12.9613	2.25e-05	Tia1-Mus musculus adult male tongue cDNA, RIKEN full-length enriched library, clone:2310026D05 product:cytotoxic granule-associated RNA binding protein 1, full insert sequence.
1454714_x_at	5.32609	3.14e-05	3-phosphoglycerate dehydrogenase; last exon and proximal 3' UTR
1416479_a_at	7.51035	6.15e-05	Tmem14c-RIKEN cDNA 1110021D01 gene
1424857_a_at	2.64222	6.22e-05	tripartite motif protein 34
1417821_at	11.0505	8.2e-05	DNA segment, Chr 17, human D6S56E 5
1417762_a_at	2.01079	0.00015	ribosomal protein L8
1423748_at	4.67661	0.000158	pyruvate dehydrogenase kinase isoenzyme 1; distal 3' UTR
1428239_at	1.99115	0.000198	ankyrin repeat domain 16; 3' UTR
1451965_at	3.64628	0.000255	Ig rearranged kappa-chain gene V19-J1 region.
1453119_at	2.37117	0.000344	RIKEN cDNA 4933428L19 gene
1416629_at	2.96858	0.000477	solute carrier family 1 (neutral amino acid transporter), member 5
1442338_at	6.77913	0.000529	Transcribed sequence with weak similarity to protein ref:NP_081764.1 (M.musculus) RIKEN cDNA 5730493B19 [Mus musculus]
1421550_a_at	3.06385	0.000529	tripartite motif protein 34
1435331_at	2.91268	0.000529	expressed sequence AI447904
1442023_at	3.27953	0.00071	Adult male aorta and vein cDNA, RIKEN full-length enriched library, clone:A530060O18 product:unknown EST, full insert sequence
1441823_at	7.03842	0.000744	Ria17
1425436_x_at	2.30293	0.000858	killer cell lectin-like receptor, subfamily A, member 3
1424032_at	1.63888	0.000967	RIKEN cDNA 0610039P13 gene
1440214_at	3.14928	0.00106	RIKEN cDNA A630001G21 gene
1434441_at	3.33177	0.0011	human chromosome 9 open reading frame 21 (peroxiredoxin (PRX)-like 2 family); distal 3' UTR
1453109_at	2.86738	0.00113	RIKEN cDNA 2810429K17 gene
1437007_x_at	5.28321	0.00123	ubiquitin specific protease 39
1417961_a_at	2.98775	0.00123	tripartite motif protein 30
1451253_at	2.99294	0.00142	PX domain containing serine/threonine kinase
1422188_s_at	2.80694	0.00156	T-cell receptor gamma, variable 4
1443858_at	17.2856	0.00179	Trim5
1436061_at	7.04501	0.00185	chromatin assembly factor 1, subunit A (p150)
1426112_a_at	2.55135	0.00206	CD72 antigen
1442219_at	2.07413	0.00206	membrane-spanning 4-domains, subfamily A, member 4B
1447458_at	2.92014	0.00214	ST3 beta-galactoside alpha-2,3-sialyltransferase 4
1455734_at	2.41234	0.00214	tRNA nucleotidyl transferase, CCA-adding, 1
1416770_at	2.35459	0.00214	serine/threonine kinase 25 (yeast)
1417316_at	1.80798	0.00214	thioesterase superfamily member 2
1424043_at	1.92439	0.00223	peptidylprolyl isomerase (cyclophilin)-like 4
1460431_at	1.80085	0.00234	glucosaminyl (N-acetyl) transferase 1, core 2
1449648_s_at	3.19062	0.00241	exportin 5
1433898_at	1.93404	0.00261	solute carrier family 25, member 30
1455287_at	2.74053	0.00276	9 days embryo whole body cDNA, RIKEN full-length enriched library, clone:D030050E20 product:unclassifiable, full insert sequence
1437393_at	2.28164	0.00282	protein kinase C, alpha
1417953_at	1.49877	0.00283	family with sequence similarity 3, member C, photoreceptor associated, cytokine like secreted protein with a GG domain; proximal 3' UTR
1456426_at	1.92781	0.0029	C-type lectin domain family 2, member i
1420994_at	1.89408	0.00292	UDP-GlcNAc:betaGal beta-1,3-N-acetylglucosaminyltransferase 5
1460204_at	1.88688	0.00292	cytoplasmic tyrosine kinase, Dscr28C related (Drosophila)
1448862_at	1.65653	0.0031	intercellular adhesion molecule 2
1419706_a_at	1.87832	0.00319	A kinase (PRKA) anchor protein (gravin) 12
1454977_at	1.25084	0.00322	expressed sequence AU020772
1435745_at	2.95435	0.00342	RIKEN cDNA 5031439G07 gene
1434312_at	1.97815	0.00342	ADP-ribosylation factor 6
1433599_at	1.95788	0.00343	cDNA sequence BC065123
1448706_at	2.07544	0.00344	Traf and Tnf receptor associated protein
1428662_a_at	2.23571	0.00354	HOP homeobox; mid and mid distal 3' UTR
1460555_at	1.98131	0.00354	family with sequence similarity 65, member B, Diff40 protein
1442693_at	2.77492	0.00376	tripartite motif protein 34
1451602_at	8.73737	0.00377	sorting nexin 6
1425802_a_at	2.57828	0.00378	expressed sequence BB219290
1440298_at	2.6793	0.0039	Transcribed sequences
1419481_at	1.8837	0.00402	selectin, lymphocyte
1460224_at	1.63118	0.00427	sorting nexin 2
1436494_x_at	2.23254	0.00478	TRM1 tRNA methyltransferase 1; last two exons
1449198_a_at	1.54174	0.00504	sialyltransferase 9 (CMP-NeuAc:lactosylceramide alpha-2,3-sialyltransferase)
1436337_at	1.71645	0.0052	cyclin D binding myb-like transcription factor 1
1448472_at	4.43679	0.00549	valyl-tRNA synthetase 2
1454646_at	1.69793	0.00581	t-complex 11 like 2; 3' UTR
1438454_at	6.02191	0.00653	phosphatase and tensin homolog
1439789_at	1.82318	0.00653	early B-cell factor 1
1423667_at	2.00268	0.00657	methionine adenosyltransferase II, alpha
1426401_at	1.82644	0.00689	protein phosphatase 3, catalytic subunit, alpha isoform
1449570_at	3.67552	0.00709	killer cell lectin-like receptor subfamily B member 1C
1438725_at	2.3982	0.00709	thyroid hormone receptor associated protein 1
1455539_at	1.73618	0.00719	glycosylphosphatidylinositol specific phospholipase D1
1416387_at	1.56546	0.00719	phosphatidylinositol-4-phosphate 5-kinase, type II, gamma
1447934_at	4.4948	0.00722	RIKEN cDNA 9630033F20 gene
1454785_at	1.71347	0.00754	dual specificity phosphatase 11 (RNA/RNP complex 1-interacting)
1421186_at	1.82981	0.00778	chemokine (C-C) receptor 2
1428592_s_at	2.23486	0.00783	ubiquitin specific protease 38
1435698_at	1.62701	0.00795	rapamycin-insensitive companion of mTOR; distal 3' UTR
1434192_at	1.39378	0.00815	zinc finger, ZZ-type with EF hand domain 1; distal 3' UTR
1416957_at	1.81617	0.0082	POU domain, class 2, associating factor 1
1418462_at	1.97606	0.00827	polymyositis/scleroderma autoantigen 1
1435862_at	1.63623	0.00827	Son cell proliferation protein
1418536_at	2.3819	0.00829	histocompatibility 2, Q region locus 7
1448450_at	1.55701	0.0084	adenylate kinase 2
1453752_at	3.12518	0.00866	ribosomal protein L17
1424683_at	1.44785	0.00876	family with sequence similarity 134, member B; distal 3' UTR
1442305_at	3.88023	0.00882	GTP binding protein 2
1456706_at	7.25246	0.00935	possibly zinc finger, SWIM-type containing 6; intron 1
1419480_at	2.11005	0.00935	selectin, lymphocyte
1444575_at	1.2679	0.00938	Transcribed sequence with moderate similarity to protein ref:NP_061981.1 (H.sapiens) hypothetical protein FLJ12886 [Homo sapiens]
1455530_at	2.42512	0.00957	Similar to Ig delta chain C region, membrane-bound form - mouse (LOC382646), mRNA
1456494_a_at	2.04825	0.00959	tripartite motif protein 30-like
1434378_a_at	2.13906	0.00964	Max dimerization protein 4
1426218_at	2.40479	0.00981	glucocorticoid induced transcript 1
1437626_at	1.74681	0.00994	Brf2 gene, 3' UTR
1451622_at	1.61131	0.0111	RIKEN cDNA 0910001K20 gene
1434573_at	1.43337	0.0119	RIKEN cDNA 6030423D04 gene
1457587_at	2.55648	0.0122	Adult male spinal cord cDNA, RIKEN full-length enriched library, clone:A330095G09 product:unknown EST, full insert sequence
1429004_at	1.7482	0.0122	pleckstrin homology domain interacting protein
1455070_at	1.96944	0.0123	Transcribed sequence with weak similarity to protein ref:NP_081764.1 (M.musculus) RIKEN cDNA 5730493B19 [Mus musculus]
1458299_s_at	2.47267	0.0124	BB820441 RIKEN full-length enriched, mammary gland RCB-0526 Jyg-MC(A) cDNA Mus musculus cDNA clone G830005J05 3', mRNA sequence.
1436515_at	2.35057	0.0127	0 day neonate lung cDNA, RIKEN full-length enriched library, clone:E030004N02 product:unknown EST, full insert sequence
1425005_at	2.2791	0.0127	killer cell lectin-like receptor subfamily C, member 1
1450639_at	1.60114	0.0127	synonyms: Cnt2, B430217P18, 2010208B10Rik; purine-selective Na+ nucleoside cotransporter; go_component: integral to plasma membrane [goid 0005887] [evidence ISS] [pmid 10721696]; go_component: membrane [goid 0016020] [evidence IEA]; go_component: integral
1452268_at	1.96499	0.013	RIKEN cDNA 2810485I05 gene
1431020_a_at	1.68808	0.013	RIKEN cDNA 1500031J01 gene
1427322_at	1.98929	0.0135	WD repeat domain 9
1455581_x_at	2.10613	0.0139	Adult male testis cDNA, RIKEN full-length enriched library, clone:4921508F21 product:similar to HISTOCOMPATIBILITY 2, CLASS II ANTIGEN E BETA [Mus musculus], full insert sequence
1434648_a_at	1.36022	0.0142	cerebral cavernous malformation 2 homolog (human)
1458038_at	9.37208	0.0151	Transcribed sequence with weak similarity to protein ref:NP_081764.1 (M.musculus) RIKEN cDNA 5730493B19 [Mus musculus]
1434034_at	1.97281	0.0151	ceramide kinase
1454666_at	1.55742	0.0151	Kruppel-like factor 3 (basic)
1436953_at	1.48374	0.0151	Wiskott-Aldrich syndrome protein interacting protein
1438404_at	1.66171	0.0152	ring finger protein 144
1434692_at	1.52142	0.0152	RIKEN cDNA 1110034B05 gene
1421817_at	1.83593	0.0157	glutathione reductase 1
1451860_a_at	1.50156	0.0159	tripartite motif protein 30
1429969_at	3.81242	0.0161	GTPase, IMAP family member 5
1436585_at	2.44705	0.0163	Transcribed sequences
1444878_at	6.25533	0.0164	Adult male hippocampus cDNA, RIKEN full-length enriched library, clone:C630003L08 product:unknown EST, full insert sequence
1436589_x_at	1.98355	0.0165	expressed sequence AI325941
1422886_a_at	1.90295	0.0165	CDC like kinase 4
1429413_at	2.07629	0.0168	RIKEN cDNA 5730456K23 gene
1428651_at	1.77625	0.0168	RIKEN cDNA 4930429H24 gene
1438442_at	1.7737	0.0168	Adult male bone cDNA, RIKEN full-length enriched library, clone:9830002K13 product:unclassifiable, full insert sequence
1421867_at	1.5521	0.0168	nuclear receptor subfamily 3, group C, member 1
1449138_at	1.5126	0.0168	splicing factor 3b, subunit 1
1420671_x_at	1.79827	0.0168	membrane-spanning 4-domains, subfamily A, member 4C
1434062_at	1.82827	0.0175	RIKEN cDNA 9630005B12 gene
1422591_at	1.62808	0.0175	transcription elongation factor B (SIII), polypeptide 3
1426397_at	1.32019	0.0176	transforming growth factor, beta receptor II
1418342_at	1.32237	0.0179	replication factor C 1
1436172_at	2.43259	0.0182	Adult male testis cDNA, RIKEN full-length enriched library, clone:4921508F21 product:similar to HISTOCOMPATIBILITY 2, CLASS II ANTIGEN E BETA [Mus musculus], full insert sequence
1428674_at	1.36036	0.0185	RIKEN cDNA 1110021E09 gene
1428593_at	1.59863	0.0189	RIKEN cDNA 1700029F09 gene
1448142_x_at	1.41026	0.0189	ribosomal protein S13
1433512_at	1.29155	0.0189	Friend leukemia integration 1
1457773_at	2.5224	0.019	lymphocyte antigen 108
1424375_s_at	1.80918	0.0196	immune associated nucleotide 1
1448057_at	1.46205	0.0197	ic45f11.y1 Melton Normalized Mixed Mouse Pancreas 1 N1-MMS1 Mus musculus cDNA clone IMAGE:5656844 5', mRNA sequence.
1426810_at	1.80751	0.0204	jumonji domain containing 1
1437395_at	2.064	0.0206	601219152F1 NCI_CGAP_Lu29 Mus musculus cDNA clone IMAGE:3588133 5', mRNA sequence.
1446608_at	4.6878	0.0207	Casitas B-lineage lymphoma
1456018_at	1.45011	0.0209	expressed sequence AL022779
1417387_at	1.32702	0.021	RIKEN cDNA 3110004H13 gene
1452393_at	1.97077	0.0212	expressed sequence AI597013
1418035_a_at	1.75223	0.0212	DNA primase, p58 subunit
1433910_at	1.28188	0.0212	zinc finger, CCHC domain containing 6
1427325_s_at	1.8508	0.0217	expressed sequence AI597013
1429193_at	1.64009	0.0219	RIKEN cDNA 4631416I11 gene
1453371_at	2.35287	0.022	RIKEN cDNA 4930535B03 gene
1416118_at	1.76226	0.022	RIKEN cDNA 2310035M22 gene
1446553_at	1.72938	0.0224	Transcribed sequences
1435133_at	1.6086	0.0224	UDP-glucose ceramide glucosyltransferase
1450997_at	1.45763	0.0226	serine/threonine kinase 17b (apoptosis-inducing)
1434882_at	1.48689	0.0227	RIKEN cDNA 2610103J23 gene
1435464_at	2.29469	0.0228	RIKEN cDNA 1110003E01 gene
1437105_at	1.85967	0.0232	jumonji, AT rich interactive domain 1A (Rbp2 like)
1446484_at	3.0266	0.0233	2 days pregnant adult female ovary cDNA, RIKEN full-length enriched library, clone:E330033N02 product:unclassifiable, full insert sequence
1418337_at	1.54016	0.0234	ribose 5-phosphate isomerase A
1441317_x_at	1.83161	0.0235	BB316060 RIKEN full-length enriched, adult male corpora quadrigemina Mus musculus cDNA clone B230362J06 3', mRNA sequence.
1452937_s_at	2.04897	0.0237	RIKEN cDNA 1810010N17 gene
1442801_x_at	7.58741	0.024	transmembrane 7 superfamily member 3; distal 3' UTR
1420638_at	1.83597	0.024	phosphoribosyl pyrophosphate synthetase 2
1451507_at	1.6768	0.0243	myocyte enhancer factor 2C
1445271_at	4.2842	0.0244	tripartite motif-containing 5; last five exons
1431008_at	2.4372	0.0244	histocompatibility 2, Q region locus 1
1456126_at	1.44777	0.0244	mucosa associated lymphoid tissue lymphoma translocation gene 1
1423452_at	1.52488	0.0246	serine/threonine kinase 17b (apoptosis-inducing)
1425538_x_at	3.36142	0.0249	CEA-related cell adhesion molecule 1
1416767_a_at	1.51787	0.025	RIKEN cDNA 1110003E01 gene
1424170_at	1.92275	0.0253	PHD finger protein 5A
1454799_at	1.6671	0.0254	hypothetical protein 4933408F15
1418473_at	1.72373	0.0258	RIKEN cDNA 2310039I18 gene
1436491_at	5.61554	0.0262	Adult male thymus cDNA, RIKEN full-length enriched library, clone:5830431A10 product:similar to X-LINKED LYMPHOCYTE-REGULATED 5 [Mus musculus], full insert sequence
1440304_at	2.2076	0.0263	Adult male diencephalon cDNA, RIKEN full-length enriched library, clone:9330197K07 product:unknown EST, full insert sequence
1426632_at	1.82479	0.0263	Similar to hypothetical protein MGC2376 (LOC233529), mRNA
1434002_at	2.14723	0.027	expressed sequence AW556347
1416952_at	1.59768	0.027	ATPase, H+ transporting, V1 subunit D
1422066_x_at	4.64914	0.0272	killer cell lectin-like receptor subfamily B member 1D
1451572_a_at	1.59827	0.0274	RIKEN cDNA 5230400G24 gene
1451277_at	1.89552	0.0276	RIKEN cDNA C530046K17 gene
1448419_at	1.60536	0.0276	RIKEN cDNA 1110023P21 gene
1426936_at	14.6207	0.0279	Mus musculus hypothetical protein LOC215866, mRNA (cDNA clone IMAGE:3493956), partial cds.
1429184_at	1.79025	0.0281	RIKEN cDNA 9130002C22 gene
1428141_at	1.62325	0.0282	golgi associated, gamma adaptin ear containing, ARF binding protein 2
1459827_x_at	1.80389	0.0285	Hermansky-Pudlak syndrome 1 homolog (human)
1453009_at	6.58417	0.0288	carboxypeptidase M; distal 3' UTR
1426633_s_at	2.02899	0.0288	Similar to hypothetical protein MGC2376 (LOC233529), mRNA
1434706_at	1.41334	0.0288	RIKEN cDNA 5730538E15 gene
1426124_a_at	1.89553	0.0292	CDC-like kinase
1434394_at	2.06224	0.0293	Nedd4 binding protein 2
1446130_at	6.50422	0.0297	PCTAIRE-motif protein kinase 2
1451214_at	1.26285	0.0304	kelch repeat and BTB (POZ) domain containing 2
1457809_at	1.45082	0.0308	p300/CBP-associated factor
1451833_a_at	1.91628	0.0311	SET domain, bifurcated 1
1434082_at	1.37378	0.0311	PCTAIRE-motif protein kinase 2
1452377_at	1.80876	0.0312	Mus musculus 8 days embryo whole body cDNA, RIKEN full-length enriched library, clone:5730410F24 product:myeloid/lymphoid or mixed-lineage leukemia, full insert sequence.
1425769_x_at	1.66135	0.0313	RIKEN cDNA 1700001C14 gene
1436315_at	1.44292	0.0313	MYST histone acetyltransferase (monocytic leukemia) 3
1426985_s_at	2.03316	0.0314	RIKEN cDNA 2810485I05 gene
1434478_at	1.59798	0.0314	Similar to headcase homolog; hHDC for homolog of Drosophila headcase (LOC380629), mRNA
1426476_at	1.46327	0.0314	RAS p21 protein activator 1
1451216_at	1.45965	0.0315	zinc finger protein 330
1426469_a_at	1.42418	0.0316	TATA box binding protein
1454711_at	1.30094	0.0321	triple functional domain (PTPRF interacting)
1437162_at	10.0373	0.0325	cell cycle associated protein 1 (cytoplasmic activation- and proliferation-associated protein 1)
1452224_at	1.41911	0.0326	RIKEN cDNA 1110051N18 gene
1434295_at	1.64326	0.0333	RAS guanyl releasing protein 1
1454880_s_at	1.34116	0.0335	Transcribed sequences
1435665_at	3.25541	0.0336	tripartite motif protein 30-like
1436925_at	1.73087	0.0336	expressed sequence AW556347
1455728_at	1.66976	0.0336	phosphatase and tensin homolog
1416917_at	1.22759	0.0336	RIKEN cDNA 1700123O20 gene
1432492_a_at	1.93386	0.0338	3-hydroxyanthranilate 3,4-dioxygenase
1452815_at	1.70719	0.0339	purinergic receptor P2Y, G-protein coupled 10
1423113_a_at	1.23185	0.0339	ubiquitin-conjugating enzyme E2D 3 (UBC4/5 homolog, yeast)
1438858_x_at	2.07994	0.0344	histocompatibility 2, class II antigen A, alpha
1416559_at	1.96547	0.0346	RIKEN cDNA 1500003O22 gene
1439780_at	3.47106	0.0349	Transcribed sequence with moderate similarity to protein sp:P00722 (E. coli) BGAL_ECOLI Beta-galactosidase
1425336_x_at	1.27731	0.0354	histocompatibility 2, K region
1437584_at	10.6037	0.0359	WD repeat domain 5B
1429384_at	1.52445	0.0359	RIKEN cDNA 3300002K07 gene
1426459_s_at	2.04345	0.0362	expressed sequence AW549877
1452150_at	1.40577	0.0365	expressed sequence AU040320
1456595_x_at	1.71805	0.0367	BB026232 RIKEN full-length enriched, adult male pituitary gland Mus musculus cDNA clone 5330432C16 3', mRNA sequence.
1419165_at	1.35509	0.0368	zinc finger protein 260
1452046_a_at	1.24238	0.0368	protein phosphatase 1, catalytic subunit, gamma isoform
1424002_at	1.51685	0.0368	phosducin-like 3
1422018_at	1.87442	0.0372	human immunodeficiency virus type I enhancer binding protein 2
1435768_at	1.49908	0.0372	AT rich interactive domain 4B (Rbp1 like)
1455600_at	1.75507	0.0379	H3079H07-3 NIA Mouse 15K cDNA Clone Set Mus musculus cDNA clone H3079H07 3', mRNA sequence.
1453362_x_at	1.54824	0.0379	ribosomal protein S24
1435477_s_at	1.43568	0.0379	Fc receptor, IgG, low affinity IIb
1426138_a_at	1.26278	0.038	ubiquitin-conjugating enzyme E2, J2 homolog (yeast)
1445545_at	3.71313	0.0384	RIKEN cDNA 2610318G18 gene
1433564_at	2.01336	0.0387	diacylglycerol kinase, delta
1434714_at	1.51397	0.0387	Transcribed sequence with weak similarity to protein ref:NP_055399.1 (H.sapiens) ERO1-like
1450026_a_at	1.3392	0.0387	UDP-GlcNAc:betaGal beta-1,3-N-acetylglucosaminyltransferase 1
1420624_a_at	1.30072	0.039	vesicle-associated membrane protein 8
1452239_at	1.71793	0.0391	4 days neonate thymus cDNA, RIKEN full-length enriched library, clone:B630013J18 product:gene trap ROSA 26, Philippe Soriano, full insert sequence
1456875_at	1.45874	0.0391	RIKEN cDNA 1810013L24 gene
1424429_s_at	1.37787	0.0391	double C2, alpha
1416857_at	1.26446	0.0391	stromal cell derived factor 2
1448129_at	1.32787	0.0392	actin related protein 2/3 complex, subunit 5
1428364_at	1.44019	0.0394	sodium channel modifier 1
1439775_at	2.10659	0.0396	9 days embryo whole body cDNA, RIKEN full-length enriched library, clone:D030064D06 product:unknown EST, full insert sequence
1452222_at	1.52479	0.0398	utrophin
1441545_at	2.37026	0.0405	RIKEN cDNA 6030404K05 gene
1418125_at	1.33693	0.0406	RIKEN cDNA 4632409L19 gene
1418502_a_at	1.17849	0.0406	oxidation resistance 1
1426907_s_at	1.74118	0.0409	expressed sequence AW494914
1434955_at	1.78279	0.0411	RIKEN cDNA 2900024D24 gene
1455668_at	1.52115	0.0421	Wolf-Hirschhorn syndrome candidate 1-like 1 (human)
1439484_at	2.03252	0.0422	phosphodiesterase 7A
1436212_at	1.69958	0.0422	expressed sequence AI661017
1450945_at	3.30985	0.0435	protein kinase C, alpha
1454810_s_at	1.59384	0.0437	expressed sequence AI315068
1436936_s_at	1.56618	0.0437	0 day neonate thymus cDNA, RIKEN full-length enriched library, clone:A430022B11 product:inactive X specific transcripts, full insert sequence
1458994_at	3.60801	0.0438	casein kinase 1, gamma 3
1460436_at	2.78626	0.0438	N-deacetylase/N-sulfotransferase (heparan glucosaminyl) 1
1452596_at	2.36648	0.0438	polymerase (RNA) II (DNA directed) polypeptide K
1435203_at	2.01558	0.0438	mannosidase 2, alpha 2
1434260_at	1.86819	0.0438	BB461848 RIKEN full-length enriched, 12 days embryo spinal ganglion Mus musculus cDNA clone D130073P18 3', mRNA sequence.
1435397_at	1.42934	0.0438	cDNA sequence BC038156
1460603_at	1.59865	0.0446	Transcribed sequences
1425346_at	2.25531	0.045	zinc finger protein 318
1438487_s_at	1.59698	0.0451	BB724567 RIKEN full-length enriched, 2 days neonate thymus thymic cells Mus musculus cDNA clone C920026P08 3', mRNA sequence.
1417640_at	1.37911	0.0451	CD79B antigen
1442824_at	3.18149	0.0451	hnRNP-associated with lethal yellow; first intron
1442494_at	2.58509	0.0452	Transcribed sequences
1422921_at	1.92267	0.046	pre-B lymphocyte gene 3
1416892_s_at	1.38107	0.0464	RIKEN cDNA 3110001A13 gene
1452697_at	1.21564	0.0467	CTD (carboxy-terminal domain, RNA polymerase II, polypeptide A) phosphatase, subunit 1
1454722_at	1.30564	0.0469	hypothetical protein B230218H07
1416503_at	1.73961	0.0471	latexin
1427441_a_at	3.45631	0.0472	succinate-Coenzyme A ligase, GDP-forming, beta subunit
1419307_at	1.84069	0.0475	tumor necrosis factor receptor superfamily, member 13c
1435002_at	1.43326	0.0475	RIKEN cDNA 1810022O10 gene
1459026_at	3.64194	0.0476	SKI interacting protein
1443796_at	3.29618	0.0481	Transcribed sequences
1438673_at	1.77398	0.0481	solute carrier family 4, sodium bicarbonate cotransporter, member 7
1454967_at	1.39956	0.0481	RIKEN cDNA A930001N09 gene
1451988_s_at	1.24172	0.0485	RIKEN cDNA 2010012F05 gene
1438334_at	1.99108	0.0486	dedicator of cyto-kinesis 2
1440974_at	2.9172	0.0488	RIKEN cDNA 1110059P08 gene
1430030_at	2.27528	0.0488	RIKEN cDNA 5330426P16 gene
1421284_at	1.3397	0.0488	phosphatidylinositol glycan, class N
1425553_s_at	1.62719	0.0495	huntingtin interacting protein 1 related
1460025_at	1.40396	0.0497	leucine-rich repeats and immunoglobulin-like domains 2
Statistical analysis of mRNA expression data by 1-way-ANOVA (Benjamini-Hochberg, p<0.05) followed by hierarchical clustering identified 298 probe sets of lower expression in spleen leukocytes of 4 week old NOD mice compared to 2 control strains (NON and C57BL/6). Fold change was calculated based on mean expression values for NOD mice versus mean expression values for control mice combined. The pr…

## Sheet: Table S5B_29hiNOD4wk
Table S5B. 29 probesets of significantly higher expression in spleen leukocytes from 4 week old NOD mice compared to two control strains.
ID_REF	FoldChange_NODvCtrls	adjustedpvalue,benj (1w-Anova)	Gene Description
1457769_at	26.5534	7.49e-05	histocompatibility 60
1427799_x_at	4.46561	0.000109	immunoglobulin kappa chain variable 8 (V8)
1417461_at	29.4105	0.00017	CAP, adenylate cyclase-associated protein 1 (yeast), distal 3' UTR
1424948_x_at	2.89096	0.00039	histocompatibility 2, K region
1427434_at	1.98772	0.000558	baculoviral IAP repeat-containing 1f
1417462_at	43.5123	0.00064	CAP, adenylate cyclase-associated protein 1 (yeast), exons 9, 11, 13 and proximal 3' UTR
1435660_at	2.89018	0.00117	similar to SP140 nuclear body protein; nuclear body protein Sp140
1437171_x_at	2.54933	0.00185	gelsolin
1426775_s_at	2.32997	0.00269	secretory carrier membrane protein 1
1425477_x_at	2.39904	0.00402	histocompatibility 2, class II antigen A, beta 1
1424265_at	3.50135	0.00596	N-acetylneuraminate pyruvate lyase
1437593_x_at	1.83128	0.00689	apoptosis inhibitor 5
1422412_x_at	5.34681	0.00964	eosinophil-associated, ribonuclease A family, member 3
1425385_a_at	5.86877	0.0151	immunoglobulin heavy chain 1a (serum IgG2a)
1421056_at	5.17689	0.0185	deoxyribonuclease 1-like 3
1427883_a_at	4.40829	0.0191	procollagen, type III, alpha 1
1450107_a_at	1.67283	0.0202	renin binding protein
1420987_at	2.38285	0.0206	kinesin family member 3B
1439897_at	1.63145	0.0216	nebulette
1424754_at	2.42378	0.0218	membrane-spanning 4-domains, subfamily A, member 7
1424176_a_at	7.86171	0.0288	annexin A4
1452330_a_at	2.19453	0.0311	matrix-remodelling associated 8; mid and distal 3' UTR
1418282_x_at	19.871	0.0339	serine (or cysteine) proteinase inhibitor, clade A, member 1b
1437844_x_at	1.3887	0.0349	component of oligomeric golgi complex 1
1450905_at	1.73333	0.0354	plexin C1
1424778_at	2.14215	0.0384	DNA segment, Chr 10, University of California at Los Angeles 1
1457259_at	1.81206	0.0391	sorting nexin 6; far 3' UTR, polymorphic SINE (anticorrelated to coding exons of Snx6)
1416514_a_at	3.687	0.045	fascin homolog 1, actin bundling protein (Strongylocentrotus) purpuratus)
1436479_a_at	1.73668	0.0495	dipeptidylpeptidase 7
Statistical analysis of mRNA expression data by 1-way-ANOVA (Benjamini-Hochberg, p<0.05) followed by hierarchical clustering identified 29 probe sets of higher expression in spleen leukocytes of 4 week old NOD mice compared to 2 control strains (NON and C57BL/6). Fold change was calculated based on mean expression values for NOD mice versus mean expression values for control mice combined. The pr…
